# Supplementary material
Source: PubMed Central journal article supplement (PMC2271136)
Supplement: NIHMS37950-supplement-supplement_S1.pdf [file NIHMS37950-supplement-supplement_S1.pdf]

## Online supplementary information S1 (box) | Members of the International HapMap Consortium and their affiliations

The International HapMap Consortium is a partnership of scientists and funding agencies from Canada, China, Japan, Nigeria, the United Kingdom and the United States to develop a public resource that will help researchers find genes that are associated with human health and disease. The following authors are members of this group (institutions and authors are listed alphabetically (except for chairs/co-chairs, who are listed first):

### Ethical, Legal, and Social Issues Group

Vanderbilt University: Ellen Wright Clayton (co-chair)<sup>1</sup>

University of Montréal: Bartha M. Knoppers (co-chair)<sup>2</sup>

Chinese Academy of Social Sciences: Renzong Qiu<sup>3</sup>

Genetic Interest Group: Alastair Kent<sup>4</sup>

Howard University: Georgia M. Dunston<sup>5</sup>

Kyoto University: Kazuto Kato<sup>6</sup>

Nagasaki University: Norio Niikawa<sup>7</sup>

University of Oklahoma: Morris W. Foster<sup>8</sup>

University of Ibadan: Isaac F. Adewole<sup>9</sup>

Wellcome Trust: Jessica Watkin<sup>10</sup>

### Community Engagement/Public Consultation and Sample Collection Groups

Beijing Normal University and Beijing Genomics Institute: Houcan Zhang<sup>11</sup> and Changqing Zeng<sup>12</sup>

Health Sciences University of Hokkaido, Shinshu University and Eubios Ethics Institute: Ichiro Matsuda<sup>13</sup>, Yoshimitsu Fukushima<sup>14</sup>, Darryl R. Macer<sup>15</sup> and Eiko Suda<sup>15</sup>

Howard University and University of Ibadan: Charles N. Rotimi<sup>5</sup>, Clement A. Adebamowo<sup>9</sup>, Toyin Anigwu<sup>9</sup>, Patricia A. Marshall<sup>16</sup>, Olayemi Matthew<sup>9</sup>, Chibuzor Nkwodimmah<sup>9</sup> and Charmaine D. M. Royal<sup>5</sup>

University of Utah: Mark F. Leppert<sup>17</sup> and Missy Dixon<sup>17</sup>

### Populations and Ethical, Legal, and Social Issues Initial Planning Group

David L. Valle (chair)<sup>18</sup>, Ellen Wright Clayton (co-chair)<sup>1</sup>, Lynn B. Jorde (co-chair)<sup>17</sup>, John W. Belmont<sup>19</sup>, Aravinda Chakravarti<sup>20</sup>, Mildred K. Cho<sup>21</sup>, Troy Duster<sup>22,23</sup>, Morris W. Foster<sup>8</sup>, Marla Jasperse<sup>24</sup>, Bartha M. Knoppers<sup>2</sup>, Pui-Yan Kwok<sup>25</sup>, Julio Licinio<sup>26</sup>, Jeffrey C. Long<sup>27</sup>, Patricia A. Marshall<sup>16</sup>, Pilar N. Ossorio<sup>28</sup>, Vivian Ota Wang<sup>1</sup>, Charles N. Rotimi<sup>5</sup>, Charmaine D. M. Royal<sup>5</sup>, Patricia Spallone<sup>10,29</sup> and Sharon F. Terry<sup>30</sup>

### Genotyping centres

Baylor College of Medicine and ParAllele BioScience: Richard A. Gibbs<sup>19</sup>, John W. Belmont<sup>19</sup>, Paul Hardenbol<sup>31</sup>, Thomas D. Willis<sup>31</sup> and Fuli Yu<sup>19</sup>

Broad Institute: David Altshuler<sup>32,33</sup> and Stacey B. Gabriel<sup>32</sup>

Chinese HapMap Consortium: Huanming Yang<sup>12</sup>, Lan-Yang Ch'ang<sup>34</sup>, Wei Huang<sup>35</sup>, Bin Liu<sup>12</sup>, Yan Shen<sup>36</sup>, Paul Kwong-Hang Tam<sup>37</sup>, Lap-Chee Tsui<sup>38</sup>, Mary Miu Yee Waye<sup>39</sup>, Jeffrey Tze-Fei Wong<sup>40</sup>, Changqing Zeng<sup>12</sup> and Qingrun Zhang<sup>12</sup>

Illumina: Mark S. Chee<sup>41</sup>, Luana M. Galver<sup>41</sup>, Semyon Kruglyak<sup>41</sup>, Sarah S. Murray<sup>41</sup> and Arnold R. Oliphant<sup>41</sup>

McGill University and G enome Qu ebec Innovation Centre: Alexandre Montpetit<sup>42</sup>, Thomas J. Hudson<sup>42</sup>, Fanny Chagnon<sup>42</sup>, Vincent Ferretti<sup>42</sup>, Martin Leboeuf<sup>42</sup>, Michael S. Phillips<sup>42</sup> and Andrei Verner<sup>42</sup>

University of California at San Francisco and Washington University: Pui-Yan Kwok<sup>25</sup>, Shenghui Duan<sup>43</sup>, Denise L. Lind<sup>25</sup>, Raymond D. Miller<sup>43</sup>, John P. Rice<sup>43</sup>, Nancy L. Saccone<sup>43</sup>, Patricia Taillon-Miller<sup>43</sup> and Ming Xiao<sup>25</sup>

University of Tokyo and RIKEN: Yusuke Nakamura<sup>44,45</sup>, Akihiro Sekine<sup>45</sup>, Koki Sorimachi<sup>45</sup>, Toshihiro Tanaka<sup>45</sup>, Yoichi Tanaka<sup>45</sup>,

Tatsuhiko Tsunoda<sup>45</sup> and Eiji Yoshino<sup>46</sup>

Wellcome Trust Sanger Institute: David R. Bentley<sup>47</sup>, Panos Deloukas<sup>47</sup> and Don Powell<sup>47</sup>

### Analysis groups

Broad Institute: David Altshuler<sup>32,33</sup>, Mark J. Daly<sup>32</sup> and Stephen F. Schaffner<sup>32</sup>

Cold Spring Harbor Laboratory: Lincoln D. Stein<sup>48</sup>, Fiona Cunningham<sup>48</sup>, Ardavan Kanani<sup>48</sup> and Gudmundur A. Thorisson<sup>48</sup>

Johns Hopkins University School of Medicine: Aravinda Chakravarti<sup>20</sup>, Peter E. Chen<sup>20</sup>, David J. Cutler<sup>20</sup>, Carl S. Kashuk<sup>20</sup> and Shin Lin<sup>20</sup>

University of Oxford: Peter Donnelly<sup>49</sup>, Jonathan Marchini<sup>49</sup>, Gilean A. T. McVean<sup>49</sup> and Simon R. Myers<sup>49</sup>

University of Oxford/Wellcome Trust Centre for Human Genetics: Lon R. Cardon<sup>50</sup>, Gonalo R. Abecasis<sup>51</sup>, Andrew Morris<sup>50</sup> and Bruce S. Weir<sup>52</sup>

US National Institutes of Health: James C. Mullikin<sup>53</sup>, Stephen T. Sherry<sup>54</sup> and Michael Feolo<sup>54</sup>

### SNP discovery

Baylor College of Medicine: Richard A. Gibbs<sup>19</sup>, John W. Belmont<sup>19</sup>, Erica Sodergren<sup>19</sup> and George M. Weinstock<sup>19</sup>

Broad Institute: Bruce W. Birren<sup>32</sup>

Washington University: Richard K. Wilson<sup>55</sup> and Lucinda L. Fulton<sup>55</sup>

Wellcome Trust Sanger Institute: Jane Rogers<sup>47</sup>

### Scientific management

Chinese Academy of Sciences: Hua Han<sup>56</sup>

Chinese Ministry of Science and Technology: Hongguang Wang<sup>57</sup>

Genome Canada: Martin Godbout<sup>58</sup> and John C. Wallenburg<sup>59</sup>

G enome Qu ebec: Paul L'Archev eque<sup>60</sup> and Guy Bellemare<sup>60</sup>

Japanese Ministry of Education, Culture, Sports, Science and Technology: Kazuo Todani<sup>61</sup>, Takashi Fujita<sup>62</sup> and Satoshi Tanaka<sup>61</sup>

The SNP Consortium: Arthur L. Holden<sup>63</sup> and Eric H. Lai<sup>64</sup>

US National Institutes of Health: Francis S. Collins<sup>65</sup>, Jean E. McEwen<sup>65</sup>, Vivian Ota Wang<sup>65</sup>, Lisa D. Brooks<sup>65</sup>, Mark S. Guyer<sup>65</sup>, Elke Jordan<sup>66</sup>, Jane L. Peterson<sup>65</sup>, Jack Spiegel<sup>67</sup>, Lawrence M. Sung<sup>68</sup> and Lynn F. Zacharia<sup>65</sup>

Wellcome Trust: Karen Kennedy<sup>10</sup>, Michael G. Dunn<sup>10</sup>, Richard Seabrook<sup>10</sup>, Mark Shillito<sup>69</sup>, Barbara Skene<sup>10</sup> and John G. Stewart<sup>10</sup>

### Methods Initial Planning Group

Eric S. Lander (chair)<sup>32</sup>, Eric H. Lai (co-chair)<sup>64</sup>, Deborah A. Nickerson (co-chair)<sup>70</sup>, Gonalo R. Abecasis<sup>51</sup>, David Altshuler<sup>32,33</sup>, David R. Bentley<sup>47</sup>, Michael Boehnke<sup>51</sup>, Lon R. Cardon<sup>50</sup>, Mark J. Daly<sup>32</sup>, Panos Deloukas<sup>47</sup>, Julie A. Douglas<sup>27</sup>, Stacey B. Gabriel<sup>32</sup>, Richard R. Hudson<sup>71</sup>, Thomas J. Hudson<sup>42</sup>, Leonid Kruglyak<sup>72</sup>, Pui-Yan Kwok<sup>25</sup>, Yusuke Nakamura<sup>44,45</sup>, Robert L. Nussbaum<sup>73</sup>, Charmaine D. M. Royal<sup>5</sup>, Stephen F. Schaffner<sup>32</sup>, Stephen T. Sherry<sup>54</sup>, Lincoln D. Stein<sup>48</sup> and Toshihiro Tanaka<sup>45</sup>

### Affiliations for participants:

<sup>1</sup>Vanderbilt University, Center for Genetics and Health Policy, 507 Light Hall, Nashville, Tennessee 37232, USA.

<sup>2</sup>University of Montr al, The Public Law Research Centre (CRDP), P.O. Box 6128, Downtown Station, Montr al, Qu ebec H3C 3J7, Canada.

<sup>3</sup>Chinese Academy of Social Sciences, Center for Applied Ethics, #2121, Bldg. 9, Caoqiao Xinyuan 3 Qu, Beijing 100054, China.

<sup>4</sup>Genetic Interest Group, 4D Leroy House, 436 Essex Rd., London N130P, UK.

<sup>5</sup>Howard University, National Human Genome Center, 2216 6th St., NW, Washington, District of Columbia 20059, USA.

<sup>6</sup>Kyoto University, Institute for Research in Humanities, Ushinomiya-cho, Sakyo-ku, Kyoto 606-8501, Japan.

- <sup>7</sup>Nagasaki University Graduate School of Biomedical Sciences, Department of Human Genetics, Sakamoto 1-12-4, Nagasaki 852-8523, Japan.
- <sup>8</sup>University of Oklahoma, Department of Anthropology, 455 W. Lindsey St., Norman, Oklahoma 73019, USA.
- <sup>9</sup>University of Ibadan College of Medicine, Ibadan, Oyo State, Nigeria.
- <sup>10</sup>Wellcome Trust, 183 Euston Rd., London NW1 2BE, UK.
- <sup>11</sup>Beijing Normal University, 19 Xijiekouwai St., Beijing 100875, China.
- <sup>12</sup>Beijing Genomics Institute, Chinese Academy of Sciences, Beijing 100300, China.
- <sup>13</sup>Health Sciences University of Hokkaido, Ezuko Institution for Developmental Disabilities, Ezumachi 575, Kumamoto, Japan.
- <sup>14</sup>Shinshu University School of Medicine, Department of Medical Genetics, Matsumoto 390-8621, Japan.
- <sup>15</sup>University of Tsukuba, Eubios Ethics Institute, P.O. Box 125, Tsukuba Science City 305-8691, Japan.
- <sup>16</sup>Case Western Reserve University School of Medicine, Department of Bioethics, 10900 Euclid Ave., Cleveland, Ohio 44106, USA.
- <sup>17</sup>University of Utah, Eccles Institute of Human Genetics, Department of Human Genetics, 15 North 2030 East, Salt Lake City, Utah 84112, USA.
- <sup>18</sup>Johns Hopkins University School of Medicine, Howard Hughes Medical Institute and the McKusick-Nathans Institute of Genetic Medicine, 725 N. Wolfe St., Baltimore, Maryland 21205, USA.
- <sup>19</sup>Baylor College of Medicine Human Genome Sequencing Center, Department of Molecular and Human Genetics, One Baylor Plaza, Houston, Texas 77030, USA.
- <sup>20</sup>Johns Hopkins University School of Medicine, McKusick-Nathans Institute of Genetic Medicine, 600 N. Wolfe St., Baltimore, Maryland 21287, USA.
- <sup>21</sup>Stanford Center for Biomedical Ethics, 701A Welch Rd., Palo Alto, California 94304, USA.
- <sup>22</sup>New York University, Department of Sociology, 269 Mercer St., New York, New York 10003, USA.
- <sup>23</sup>University of California, Berkeley, Department of Sociology, 2420 Bowditch, Berkeley, California 94720, USA.
- <sup>24</sup>University of New Mexico Health Sciences Center, 214 E. Nizhoni Blvd., Gallup, New Mexico 87301, USA.
- <sup>25</sup>University of California, San Francisco, Cardiovascular Research Institute, 505 Parnassus Ave. Long 1332A, Box 0130, San Francisco, California 94143, USA.
- <sup>26</sup>University of California, Los Angeles, School of Medicine, 695 Charles E. Young Dr. South, Los Angeles, California 90095, USA.
- <sup>27</sup>University of Michigan, Department of Human Genetics, 1241 E. Catherine St., Ann Arbor, Michigan 48109, USA.
- <sup>28</sup>University of Wisconsin School of Law, 975 Bascom Mall, Madison, Wisconsin 53706, USA.
- <sup>29</sup>The London School of Economics and Political Science, Houghton Street, London WC2A 2AE, UK.
- <sup>30</sup>Genetic Alliance, 4301 Connecticut Ave. NW, Suite 404, Washington, District of Columbia 20008, USA.
- <sup>31</sup>ParAllele Bioscience, 384 Oyster Point Blvd., Suite 8, South San Francisco, California 94080, USA.
- <sup>32</sup>The Broad Institute, 1 Kendall Square, Cambridge, Massachusetts 02139, USA.
- <sup>33</sup>Massachusetts General Hospital, 50 Blossom St., Wellman 831, Boston, Massachusetts 02114, USA.
- <sup>34</sup>Institute of Biomedical Sciences, 128 Yen-Jiou Yuan Rd., Sec. 2, Taipei, Taiwan, 115.
- <sup>35</sup>Chinese National Human Genome Center at Shanghai, 250 Bi Bo Rd., Shanghai 201203, China.
- <sup>36</sup>Chinese National Human Genome Center at Beijing, Yongchang North Rd. 3-707, Beijing Economy and Technology Development Zone, 100176, China.
- <sup>37</sup>University of Hong Kong, Genome Research Centre, 6/F, Laboratory Block, 21 Sassoon Rd., Pokfulam, Hong Kong.
- <sup>38</sup>University of Hong Kong, 10/F, Knowles Building, Pokfulam Rd., Hong Kong.
- <sup>39</sup>The Chinese University of Hong Kong, Department of Biochemistry, Rm.608, 6/F Mong Man Wai Bldg., Shatin, Hong Kong.
- <sup>40</sup>Hong Kong University of Science and Technology, Department of Biochemistry, Clear Water Bay, Knowlton, Hong Kong.
- <sup>41</sup>Illumina, 9885 Towne Centre Dr., San Diego, California 92121, USA.
- <sup>42</sup>McGill University and Génome Québec Innovation Centre, 740 Dr. Penfield Ave., Montréal, Québec H3A 1A4, Canada.
- <sup>43</sup>Washington University School of Medicine, 660 S. Euclid Ave., St. Louis, Missouri 63110, USA.
- <sup>44</sup>University of Tokyo, Institute of Medical Science, 4-6-1 Sirokanedai, Minato-ku, Tokyo 108-8639, Japan.
- <sup>45</sup>RIKEN SNP Research Center, 1-7-22 Suehiro-cho, Tsurumi-ku Yokohama, Kanagawa 230-0045, Japan.
- <sup>46</sup>RIKEN Technology Transfer and Research Coordination Division, 2-1 Hirosawa, Wako, Saitama, Japan.
- <sup>47</sup>Wellcome Trust Sanger Institute, The Wellcome Trust Genome Campus, Hinxton, Cambridge CB10 1SA, UK.
- <sup>48</sup>Cold Spring Harbor Laboratory, 1 Bungtown Rd., Cold Spring Harbor, New York 11724, USA.
- <sup>49</sup>University of Oxford, Department of Statistics, 1 South Parks Rd., Oxford OX1 3TG, UK.
- <sup>50</sup>University of Oxford/Wellcome Trust Centre for Human Genetics, Roosevelt Dr., Oxford OX3 7BN, UK.
- <sup>51</sup>University of Michigan, Department of Biostatistics, Center for Statistical Genetics, 1420 Washington Heights, Ann Arbor, Michigan 48109, USA.
- <sup>52</sup>North Carolina State University, Bioinformatics Research Center, Campus Box 7566, Raleigh, North Carolina 27695, USA.
- <sup>53</sup>US National Institutes of Health, National Human Genome Research Institute, 50 South Dr., Bethesda, Maryland 20892, USA.
- <sup>54</sup>US National Institutes of Health, National Library of Medicine, National Center for Biotechnology Information, 8600 Rockville Pike, Bethesda, Maryland 20894, USA.
- <sup>55</sup>Washington University School of Medicine, Genome Sequencing Center, Box 8501, 4444 Forest Park Ave., St. Louis, Missouri 63108, USA.
- <sup>56</sup>Chinese Academy of Sciences, 52 Sanlihe Rd., Beijing 100864, China.
- <sup>57</sup>Chinese Ministry of Science and Technology, 15 B. Fuxing Rd., Beijing 100862, China.
- <sup>58</sup>Genome Canada, 150 Metcalfe St., Suite 2100, Ottawa, Ontario K2P 1P1, Canada.
- <sup>59</sup>McGill University, Office of Technology Transfer, 3550 University St., Montréal, Québec H3A 2A7, Canada.
- <sup>60</sup>Génome Québec, 630, boul. René-Lévesque Ouest, Montréal, Québec H3B 1S6, Canada.
- <sup>61</sup>Ministry of Education, Culture, Sports, Science, and Technology, 3-2-2 Kasumigaseki, Chiyodaku, Tokyo, Japan.
- <sup>62</sup>Hiraki and Associates, Toranomon No. 5 Mori Bldg., 17-1, Toranomon 1-Chome, Minato-Ku, Tokyo 105-0001, Japan.
- <sup>63</sup>The SNP Consortium, 3 Parkway North, Deerfield, Illinois 60015, USA.
- <sup>64</sup>GlaxoSmithKline, 5 Moore Dr., Research Triangle Park, North Carolina 27709, USA.
- <sup>65</sup>US National Institutes of Health, National Human Genome Research Institute, 31 Center Dr., Bethesda, Maryland 20892, USA.
- <sup>66</sup>Foundation for the National Institutes of Health, 1 Cloister Ct.,

Bethesda, Maryland 20892, USA.

<sup>67</sup>US National Institutes of Health, Office of Technology Transfer, 6011 Executive Blvd., Rockville, Maryland 20852, USA.

<sup>68</sup>University of Maryland School of Law, 500 W. Baltimore St., Baltimore, Maryland 21201, USA.

<sup>69</sup>Herbert Smith, Exchange House, Primrose St., London EC2A 2HS, UK.

<sup>70</sup>University of Washington, Department of Genome Sciences, Box 357730, Seattle, Washington 98125, USA.

<sup>71</sup>University of Chicago, Department of Ecology and Evolution, 1101 E. 57th St., Chicago, Illinois 60637, USA.

<sup>72</sup>Fred Hutchinson Cancer Research Center, 1100 Fairview Ave. North, Seattle, Washington 98109, USA.

<sup>73</sup>US National Institutes of Health, National Human Genome Research Institute, 49 Convent Dr., Bethesda, Maryland 20892, USA.
