# Supplementary material
Source: PubMed Central journal article supplement (PMC2271136)
Supplement: NIHMS37950-supplement-supplement_S2.pdf [file NIHMS37950-supplement-supplement_S2.pdf]

**Online supplementary information S2 (box) | Acknowledgements**

We thank many people who contributed to addressing the ethical, social and cultural issues in this project: J. Greenberg and R. Anderson of the National Institutes of Health (NIH) National Institute of General Medical Sciences (NIGMS) for developing the policy on community consultation for the NIGMS Human Genetic Cell Repository at the Coriell Institute for Medical Research; J. Beck and the staff of the Coriell Institute for facilitating the implementation of the community-consultation policy and for supporting the Community Advisory Groups; M. Inaba of the Eubios Ethics Institute for contributing to the public-consultation activities in Japan; H. Zhao, Y. Wang, W. Hu, H. Zhao, Y. Gao and Q. Zhang of the Beijing Genomics Institute, Y. Zheng, D. Guan, W. Jiang, J. Li, Z. Li, W. Luo and K. Shen of Beijing Normal University, and X. Zhou, Y. Li, X. Feng and J. Ren of the Beijing Normal University Hospital for contributing to the community-engagement activities and sample collection in China; M. Deschênes and B. Godard for assistance at the University of Montréal; S. Adeniyi-Jones, D. Burgess, W. Burke, T. Citrin, D. Cowhig, P. Epps, K. Hofman, A. Holt, E. Juengst, J. Levin, A. Obuoforibo, F. Romero, C. Tamura and Y. Wang for providing advice on the project to NIH; S. Olson for providing editorial advice; A. Peck and J. Witonsky of the National Human Genome Research Institute (NHGRI) for help with project management; E. DeHaut-Combs and S. Saylor of NHGRI for staff support; M. Gray for organizing phone calls and meetings; the people of Tokyo, Japan, the Yoruba people of Ibadan, Nigeria and the community at Beijing Normal University who participated in public consultations and community engagements; and the people in these communities who were generous in donating their blood samples. This work was supported in part by Genome Canada, Génome Québec, the Chinese Ministry of Science and Technology, the Chinese Academy of Sciences, the Natural Science Foundation of China, the Hong Kong Innovation and Technology Commission, the University Grants Committee of Hong Kong, the Japanese Ministry of Education, Culture, Sports, Science and Technology, the Wellcome Trust, the SNP Consortium, the US National Institutes of Health (FIC, NCI, NCR, NEI, NHGRI, NIA, NIAAA, NIAID, NIAMS, NIBIB, NIDA, NIDCD, NIDCR, NIDDK, NIEHS, NIGMS, NIMH, NINDS, OD), the W. M. Keck Foundation and the Delores Dore Eccles Foundation.

**Online links****Further information**

Coriell Cell Repositories

<http://arginine.umdnj.edu/ccr/ccrsumm.html>

Coriell Cell Repositories NIGMS Human Genetic Cell Repository submission information

<http://locus.umdnj.edu/nigms/comm/submit/collpolicy.html>

dbSNP

<http://www.ncbi.nlm.nih.gov/SNP>

HapMap — about the project

<http://www.hapmap.org/abouthapmap.html>

HapMap — genotype access registration

<http://www.hapmap.org/cgi-perl/registration>

International HapMap Project

<http://www.hapmap.org>

National Human Genome Research Institute — past events 2001 HapMap agenda and participants

<http://www.genome.gov/10001685>

National Human Genome Research Institute — past events 2001 HapMap working groups roster

<http://www.genome.gov/10001685>
